# Supplementary material for: Recycling and Reusing Polyethylene Waste as Antistatic and Electromagnetic Interference Shielding Materials
Source: Hindawi journal article supplement (doi:10.1155/2020/6421470), 2020-06-13
Supplement: f1 [file 6421470.f1.docx]

**Supplementary Materials: Recycling and Reusing Polyethylene Waste as Antistatic and Electromagnetic Interference Shielding Materials**

Mostafizur Rahaman*, Ibrahim Abdullah Al Ghufais, Govindasami Periyasami, Ali Aldalbahi*

*Department of Chemistry, College of Science, King Saud University, Riyadh 11451, Saudi Arabia*

*Correspondence: mrahaman@ksu.edu.sa (M.R.); aaldalbahi@ksu.edu.sa (A.A.) Tel.: +966-114-675-883

**EMI Shielding Theory**

The spectrum of electromagnetic radiation is composed of wave with electric and magnetic components oscillating at right angles to each other. The electromagnetic shielding is a process of limiting flow of electromagnetic fields between two locations, by separating them with a barrier made of conductive material [1]. The electromagnetic interference is a disturbance caused in a radio receiver or other electrical circuit by electromagnetic radiation emitted from an external source. The shielding effectiveness is the amount of attenuation of incident radiation by a particular material and is expressed in dB [2]. An electromagnetic wave can be attenuated by absorption (*A*) inside the materials, by multiple internal reflections (*B*) inside the materials and also by reflection (*R*) from the outer surface. If the incident power density is denoted by *P*inc; transmitted power density by *P*trans and reflected power density by *P*ref, then the net shielding effectiveness (SE) and loss due reflection are given by Eqs. 1 and 2, respectively.

SE = 10 ⁎ log10(*P*trans/*P*inc) = (A ‏+ B +‏ R) dB and; (1)

R = 10 ⁎ log10(*P*ref/*P*inc) (2)

A mathematical relation of absorption and reflection loss with conductivity applicable to both near and far field region and to both electric and magnetic field are given as [3]

A = 1.32t (*Gμf*)1/2 (3)

R = 108 +‏ log(*G/μf*) (4)

where, *t* is the thickness of sample in cm, *G* is the conductivity of sample in S/cm relative to copper, *μ* is the magnetic permeability of sample relative to vacuum, and *f* is the frequency of radiation in MHz. Above Eqs. 3 and 4 show that the absorption loss is directly proportional to the square root of conductivity and reflection loss is proportional to the log of conductivity.

**References**

1. Das NC, Khastgir D, Chacraborty A, Chaki TK (2002) J Elastomer Plast 34(3):199
2. White X, Donald RJ, Mardiguian M (1973) Electromagnetic compatibility handbook, Vol 3. Don White Consultants, Gainesville, VA
3. Olivero DA, Radford DW (1998) J Reinf Plast Compos 17(8):674
